# Supplementary material
Source: MDPI journal article supplement (https://www.mdpi.com/2306-5729/3/4/69)
Supplement: s1 [file s1]

Respondent	D1	D2	D3	D4	IA1	IA2	IA3	IA4	IA5	IA6	IA7	IA8	IA9	IA10	IA11	IA12	IA13	IA14	IA15	IA16	IA17	IA18	IA19	IA20	IA21	IA22	PA1	PA2	PA3	PA4	PA5	PA6	PA7	PA8	PA9	PA10	PA11	PA12	PA13	PA14	PA15	PA16	PA17	PA18	PA19	PA20	PA21	PA22
1	1	2	2	Maylands	4	3	2	NR	2	4	2	1	4	4	5	2	3	NR	4	5	5	2	1	2	5	4	4	3	4	NR	4	4	3	3	4	3	4	3	4	NR	4	1	4	3	3	4	3	4
2	2	2	1	Claremont	4	3	2	2	3	3	2	3	4	3	3	5	3	2	3	5	3	3	5	3	2	3	4	3	3	3	3	4	4	3	3	2	3	2	NR	NR	NR	1	3	3	2	2	4	4
3	2	6	1	Swanbourne	5	5	5	4	3	5	5	NR	5	5	5	5	4	NR	5	3	5	5	5	5	5	5	4	5	5	4	4	5	5	0	5	3	5	5	5	0	5	3	5	5	5	5	5	5
4	1	4	2	Wembley	5	4	3	4	3	4	3	2	3	4	4	4	3	4	4	4	4	4	4	4	4	4	5	5	4	4	4	4	4	4	4	4	4	5	4	4	4	4	4	4	4	4	4	4
5	2	3	1	Mt Claremont	5	4	5	1	1	3	1	1	4	NR	5	2	5	1	4	1	1	4	1	2	5	5	5	4	4	0	0	5	0	0	5	0	5	3	5	0	5	0	0	5	0	3	5	5
6	1	6	2	Cottesloe	5	2	4	4	4	3	4	1	4	5	5	3	3	4	5	4	5	4	3	2	4	5	0	0	4	4	2	3	4	0	3	0	0	3	3	4	0	2	5	4	0	0	0	0
7	1	2	2	Fremantle	4	2	4	4	NR	4	3	3	4	4	4	3	4	4	4	4	4	4	2	3	4	4	4	4	3	4	0	0	0	3	3	3	3	3	3	4	4	0	4	4	3	4	4	4
8	1	5	2	Subiaco	4	4	4	3	4	3	4	4	NR	4	NR	4	NR	3	3	2	4	3	4	4	4	4	3	3	4	3	0	0	0	2	2	2	3	2	2	3	0	5	3	2	2	3	3	3
9	1	6	1	Claremont	4	4	5	3	2	4	3	3	5	4	5	5	5	4	5	5	5	5	5	5	5	5	4	4	4	3	1	4	3	3	4	4	5	5	5	4	5	1	1	5	5	5	5	5
10	1	5	1	Claremont	3	3	5	3	4	4	2	3	3	4	4	3	4	4	4	4	3	3	3	3	4	4	3	3	4	3	3	4	3	3	3	3	3	3	3	3	4	3	3	3	3	3	4	4
11	1	5	1	Swanbourne	4	4	1	4	4	4	3	3	3	4	4	4	2	2	4	3	1	4	1	3	5	4	4	4	0	3	3	0	4	3	3	3	3	4	0	0	4	3	0	4	0	2	3	3
12	1	4	4	Melbourne	4	4	2	4	4	4	5	3	3	2	4	2	3	4	5	3	3	3	1	1	4	5	4	4	3	4	0	5	5	4	4	4	4	4	4	4	4	4	4	4	4	4	4	4
13	1	4	1	Swanbourne	5	2	4	4	5	5	5	1	5	5	5	5	4	5	5	5	5	5	3	5	5	5	4	3	5	4	2	5	5	0	4	4	5	5	4	5	5	2	5	5	5	4	3	3
14	2	4	1	Swanbourne	3	2	1	2	4	3	3	2	4	4	3	4	3	3	4	4	3	4	2	4	4	4	4	4	4	0	1	3	3	4	4	4	4	3	4	3	4	1	5	2	4	2	3	4
15	1	6	1	Claremont	5	3	4	2	5	4	4	3	4	4	4	3	3	4	3	5	3	2	1	4	5	5	4	4	4	3	4	4	3	3	4	4	4	3	3	4	3	2	3	2	1	3	3	2
16	2	6	1	Claremont	5	3	4	4	5	4	4	2	4	5	5	4	4	4	5	5	5	5	3	4	4	4	4	4	3	4	4	4	3	5	3	3	3	4	4	4	3	3	4	4	3	2	4	4
17	1	3	1	Mt Claremont	4	4	4	1	2	4	1	2	4	3	4	1	2	3	5	1	1	1	1	1	5	3	4	4	3	3	0	4	0	0	4	4	4	0	4	3	5	0	0	0	0	0	4	3
18	2	3	1	Swanbourne	3	3	4	2	1	3	3	3	4	5	4	4	4	3	5	1	1	2	1	4	5	4	5	5	4	5	5	4	4	4	4	5	5	5	4	4	2	5	5	5	4	4	3	4
19	1	4	1	Claremont	3	1	5	1	5	1	1	5	5	5	5	5	5	2	5	5	5	5	2	2	5	5	5	5	5	0	1	5	5	2	2	5	5	5	5	3	5	5	5	5	5	5	5	5
20	1	4	1	Claremont	5	5	5	1	5	5	5	1	5	5	5	5	4	3	5	5	1	5	5	5	5	5	3	3	2	5	1	5	1	3	2	3	4	4	4	2	4	1	1	5	5	5	5	3
21	1	1	1	Claremont	4	3	3	3	5	4	2	1	3	5	5	5	4	NR	NR	5	1	1	2	2	5	5	3	3	4	4	1	4	3	0	3	4	4	4	3	0	0	1	0	0	2	4	5	4
22	1	3	2	City Beach	5	5	5	3	1	5	5	5	5	5	5	5	5	5	5	1	1	5	5	5	5	5	4	4	2	3	3	3	1	3	3	3	3	3	3	3	3	3	3	3	3	3	3	3
23	2	1	1	Claremont	3	3	3	3	5	3	3	3	3	3	3	3	3	3	3	5	2	3	3	3	5	3	3	3	3	3	1	3	3	3	3	3	3	3	3	3	3	1	1	3	3	3	5	3
24	1	1	1	Claremont	3	1	1	2	5	5	4	1	3	3	5	3	3	2	5	5	4	3	1	3	5	5	5	0	0	4	5	5	4	0	4	5	5	4	4	4	4	4	4	4	0	3	5	3
25	1	4	1	Swanbourne	5	2	4	3	5	4	4	4	5	5	5	3	4	4	4	5	5	4	2	4	5	5	3	3	2	3	2	3	2	4	2	3	3	2	3	4	4	2	4	4	3	2	2	4
26	2	4	1	Swanbourne	5	5	5	5	5	5	2	1	2	5	5	5	5	5	5	5	5	2	3	5	5	5	5	5	5	5	1	5	4	0	3	1	3	3	3	3	3	1	5	3	3	2	2	4
27	1	4	1	Swanbourne	3	2	2	2	5	4	3	1	4	4	4	5	2	2	5	5	5	4	1	4	5	4	3	3	2	2	1	4	3	0	2	3	3	3	0	0	3	1	2	2	1	3	4	3
28	1	4	4	Melbourne	2	2	1	2	1	3	NR	2	4	4	4	4	4	3	5	2	2	NR	1	2	5	4	3	3	2	2	1	3	0	2	2	3	3	3	3	2	4	2	2	0	1	2	2	3
29	1	6	2	Nedlands	5	NR	NR	NR	NR	5	NR	NR	NR	NR	NR	3	NR	NR	NR	5	NR	NR	5	NR	5	NR	4	0	0	0	0	4	0	0	0	0	0	4	0	0	0	2	0	0	2	0	5	0
30	1	4	1	Swanbourne	5	2	2	4	5	3	3	2	3	4	3	3	3	3	3	5	5	4	4	1	5	5	2	0	0	4	1	4	1	0	3	3	3	3	3	3	3	1	4	4	4	0	4	4
31	2	6	1	Claremont	5	4	5	5	5	5	5	4	5	5	5	4	4	3	3	5	5	3	5	5	5	4	5	4	5	3	5	5	5	5	4	5	5	5	5	5	5	5	5	3	5	5	5	5
32	1	6	1	Claremont	5	5	5	3	2	5	NR	5	5	4	5	3	3	4	5	3	4	4	4	5	4	5	4	5	4	3	2	5	0	5	5	5	5	3	3	4	5	3	4	4	4	5	4	5
33	1	6	1	Mt Claremont	5	3	4	1	NR	4	5	2	3	5	5	2	2	3	5	1	1	1	1	2	3	4	3	2	2	3	0	2	1	0	2	3	3	0	0	3	3	0	0	0	0	3	3	3
34	2	6	1	Mt Claremont	4	3	4	2	3	4	1	2	3	4	4	4	3	2	4	3	3	3	3	3	3	3	3	3	2	3	3	3	1	3	3	3	3	3	3	3	4	3	3	3	3	3	3	3
35	1	6	1	Mt Claremont	5	4	4	4	5	5	4	3	4	5	5	3	4	5	5	5	5	4	1	2	5	5	4	4	3	4	5	5	4	3	4	5	5	3	4	5	5	5	5	4	1	2	5	5
36	2	6	1	Claremont	5	4	4	3	2	4	3	5	5	5	5	4	4	4	4	3	5	5	3	5	5	5	3	4	3	3	3	4	3	1	2	2	4	4	4	4	4	3	2	3	3	3	4	2
37	1	4	1	Swanbourne	5	NR	4	3	4	3	4	2	3	5	5	5	NR	4	5	5	4	5	4	4	4	5	4	0	3	3	3	4	5	3	4	4	4	4	0	3	4	2	4	4	3	3	3	0
38	1	3	1	Mt Claremont	4	3	4	3	4	4	3	2	4	4	4	4	4	3	4	4	4	4	3	4	4	4	4	4	3	4	3	4	4	5	4	4	4	4	4	3	4	3	4	4	4	4	4	4
39	1	5	1	Mt Claremont	5	3	4	3	5	4	5	3	4	4	5	5	3	4	5	5	5	4	2	3	4	4	4	3	4	3	2	4	3	3	4	4	4	4	3	4	4	3	3	4	3	3	4	4
40	2	4	1	Claremont	4	3	3	2	4	4	4	3	3	4	4	3	3	3	4	4	4	4	3	3	4	3	4	4	3	3	3	3	4	3	3	3	4	3	3	3	4	2	4	3	0	3	4	3
41	1	2	1	Claremont	5	4	3	3	3	4	4	1	3	5	5	1	3	5	5	2	3	2	1	4	4	5	4	4	4	3	3	4	4	2	3	4	4	2	3	4	4	2	2	3	1	3	5	4
42	1	5	1	Claremont	5	1	5	3	3	4	4	4	5	3	3	3	3	3	3	3	3	3	3	4	4	4	3	3	2	4	3	3	4	4	1	3	3	3	3	3	3	3	3	3	3	3	3	4
43	1	4	1	Swanbourne	5	3	3	3	5	4	3	1	3	5	5	3	1	4	5	5	3	1	1	3	3	5	4	4	4	3	1	5	5	5	5	3	5	5	5	5	3	1	1	5	3	5	5	5
44	1	2	1	Claremont	5	NR	NR	NR	5	4	NR	1	4	5	5	4	3	2	5	5	5	4	3	2	5	5	5	0	0	0	3	4	0	0	4	3	4	4	3	3	3	3	5	4	4	3	5	5
45	1	5	1	Claremont	5	4	4	3	2	4	3	5	5	5	5	4	4	4	4	3	5	5	3	5	5	5	3	4	3	3	3	4	3	1	2	2	4	4	4	4	4	3	2	3	3	3	4	2
46	1	3	1	Claremont	4	4	3	4	3	3	3	1	3	5	5	1	1	4	5	3	5	1	1	3	3	3	3	4	3	3	4	4	4	0	4	3	3	4	4	3	3	4	3	4	1	4	4	4
47	1	4	1	Claremont	4	3	3	4	5	4	4	3	3	4	4	3	3	3	4	4	4	4	3	3	4	4	3	4	4	3	2	3	3	3	3	3	3	3	3	3	4	2	4	4	3	4	3	3
48	1	5	1	Claremont	4	3	3	3	3	4	3	2	3	3	5	4	3	3	4	3	4	4	4	4	5	4	4	4	4	3	3	4	3	0	3	3	4	4	3	3	3	3	3	4	4	3	3	3
49	1	3	1	Claremont	5	3	5	1	1	5	5	1	4	5	5	3	3	1	5	1	1	4	1	3	5	5	3	4	3	5	0	5	3	0	2	4	4	4	5	0	4	0	0	4	0	5	3	5
50	2	4	3	Geraldton	4	3	4	2	2	5	1	1	5	5	5	3	5	1	5	1	1	5	4	5	5	4	4	4	4	4	4	5	2	1	5	4	4	4	5	4	4	4	4	5	4	4	5	4
51	1	3	3	Geraldton	5	4	4	4	2	5	4	2	5	5	5	1	4	4	5	2	4	1	1	4	5	5	4	3	4	4	3	3	3	3	3	3	4	3	4	4	4	3	3	3	3	4	3	3
52	2	4	1	Swanbourne	4	3	3	2	4	4	2	2	4	4	4	4	3	3	4	4	4	3	3	4	4	4	3	4	4	3	NR	3	3	5	3	5	3	3	3	3	2	2	4	3	2	3	4	4
53	1	3	1	Swanbourne	4	3	4	3	5	3	4	1	3	4	4	3	3	3	4	5	4	4	3	4	5	4	3	4	4	3	1	4	3	0	3	4	4	4	4	4	4	1	4	4	4	4	2	4
54	1	4	4	Bowral	4	3	4	3	4	3	3	2	4	4	4	4	3	3	4	4	4	4	3	3	4	4	4	3	4	3	4	4	3	0	4	4	4	3	3	4	4	4	4	4	4	4	4	3
55	1	5	1	Swanbourne	4	3	5	1	5	4	1	NR	2	5	5	5	3	1	5	5	5	3	1	1	4	5	5	2	3	4	4	4	1	0	4	0	4	4	4	4	3	3	5	4	4	4	5	4
56	2	4	1	Claremont	3	2	3	3	3	4	2	2	3	4	4	3	3	3	4	3	3	3	2	4	3	4	4	4	4	4	4	4	4	3	3	3	3	3	4	3	4	3	3	3	4	4	4	4
57	1	4	1	Swanbourne	5	2	4	2	5	4	3	4	3	4	5	3	2	2	5	4	4	1	2	3	4	4	5	4	4	0	4	4	3	4	4	4	4	4	4	4	5	4	4	5	4	3	4	4
58	2	5	1	Swanbourne	3	3	4	2	4	5	2	1	2	NR	5	3	1	3	5	4	4	4	3	3	5	5	3	3	4	3	3	2	3	4	4	0	4	4	4	3	5	4	4	4	3	3	3	0
59	2	4	4	Bowral	4	4	3	2	4	4	2	2	3	4	4	3	3	3	4	4	4	2	2	3	3	4	4	4	3	3	3	4	4	0	4	4	3	4	4	3	3	4	4	0	0	3	3	4
60	NR	NR	1	Claremont	NR	NR	NR	NR	NR	NR	NR	NR	NR	NR	NR	NR	NR	NR	NR	NR	NR	NR	NR	NR	NR	NR	0	0	0	0	0	0	0	0	0	0	0	0	0	0	0	0	0	0	0	0	0	0
61	1	6	1	Swanbourne	5	5	4	4	NR	NR	5	2	5	5	5	4	4	4	5	NR	NR	4	4	4	5	NR	4	4	0	4	0	0	5	0	4	0	5	4	4	4	5	0	0	4	0	4	5	0
62	2	3	1	Claremont	3	4	5	1	5	3	1	1	3	5	5	3	1	2	5	5	5	4	1	3	3	3	4	3	4	5	2	5	5	3	3	3	3	3	3	3	3	1	3	5	0	2	5	3
63	2	2	1	Claremont	3	4	4	3	2	4	5	4	5	3	3	5	4	3	4	1	1	1	4	4	4	4	5	5	5	5	0	5	5	4	5	3	5	5	5	3	4	4	4	4	3	4	4	4
64	2	1	2	Daglish	4	1	1	3	4	4	5	3	5	4	4	5	5	4	5	5	3	4	3	3	4	5	2	0	0	0	3	4	3	3	2	3	3	2	5	3	3	3	3	3	3	3	3	3
65	1	4	1	Claremont	4	3	3	2	2	3	1	2	4	4	4	4	4	2	3	1	4	3	1	3	4	4	4	4	3	3	3	3	1	3	3	2	4	4	4	2	3	1	2	3	1	3	2	3
66	1	3	2	Cottesloe	4	1	5	3	2	4	3	3	3	4	4	4	3	3	4	2	2	4	2	3	4	3	3	3	4	3	0	3	3	3	3	2	2	3	3	3	3	3	3	2	3	3	4	3
67	2	3	2	Cottesloe	3	3	4	3	1	4	3	4	3	4	4	2	2	4	3	1	1	3	1	3	4	4	4	4	4	3	0	4	3	4	0	3	4	0	0	4	4	0	0	3	0	3	5	5
68	1	3	2	Karrakatta	5	3	5	3	1	5	3	1	3	3	3	1	1	1	5	1	1	3	1	3	5	5	5	5	5	3	0	3	4	4	5	3	5	0	0	0	5	0	0	5	0	0	5	5
69	1	5	1	Claremont	5	3	4	4	4	5	2	1	2	NR	NR	2	2	4	5	5	5	1	1	1	5	5	5	4	4	3	3	5	5	0	0	0	0	4	4	4	5	3	3	0	0	0	1	5
70	2	3	1	Swanbourne	4	3	4	2	3	NR	2	3	3	2	3	3	3	4	3	5	5	3	3	3	3	3	4	3	4	2	2	2	3	3	2	3	3	3	3	4	3	4	4	3	3	3	4	4
71	1	6	1	Claremont	5	5	4	2	4	4	2	1	4	5	4	3	3	3	NR	4	4	1	2	2	4	5	3	3	3	3	5	4	5	5	3	4	3	4	5	3	0	5	5	0	0	0	0	0
72	2	5	1	Claremont	3	2	4	1	5	5	3	1	1	4	5	2	3	2	5	5	3	2	4	5	1	5	4	4	4	4	4	4	2	4	3	4	4	4	4	4	4	2	3	2	3	4	4	5
73	2	4	1	Claremont	5	3	4	3	4	4	5	2	4	5	5	3	3	5	5	5	5	3	2	3	4	4	3	4	4	2	4	4	4	3	4	4	5	4	3	2	4	4	3	3	2	4	5	3
74	2	6	1	Swanbourne	5	5	5	5	5	5	5	4	5	4	5	5	4	5	5	5	5	5	5	5	4	4	5	5	0	5	5	5	5	0	4	4	4	4	4	5	5	0	5	5	5	5	4	4
75	1	4	1	Claremont	3	3	2	3	1	3	4	3	4	5	5	3	2	3	3	1	3	3	3	3	4	4	5	5	4	4	3	4	4	4	4	4	4	4	4	4	4	2	2	4	4	4	4	3
76	NR	NR	1	Swanbourne	4	4	4	3	4	3	3	3	3	5	5	3	3	3	4	5	5	5	1	3	5	5	3	3	3	3	3	3	3	3	3	4	4	3	4	4	4	4	4	4	2	2	4	5
77	1	6	1	Claremont	4	3	1	4	1	NR	4	3	4	5	5	5	4	4	4	1	1	2	2	4	4	4	3	3	1	4	1	0	4	3	3	2	3	3	3	4	4	1	1	1	1	4	3	3
78	2	3	1	Claremont	4	3	3	2	4	4	2	2	2	5	5	2	3	2	5	5	4	3	4	4	4	5	0	0	0	0	0	0	0	0	0	0	0	0	0	0	0	0	0	0	0	0	0	0
79	2	1	1	Claremont	3	4	3	4	3	5	5	4	4	4	4	NR	NR	4	4	NR	NR	NR	NR	NR	4	5	4	5	4	4	3	4	5	0	4	4	4	0	0	4	4	0	0	0	0	0	4	5
80	1	4	5	Great Britain	5	NR	NR	3	NR	4	3	4	4	2	5	5	NR	4	3	NR	NR	5	1	4	5	3	4	0	0	4	0	4	4	5	5	0	4	5	0	4	0	0	0	5	0	4	5	0
81	1	6	1	Claremont	4	4	5	5	4	5	5	3	5	5	5	5	5	5	5	5	5	5	5	4	5	5	0	0	0	0	0	0	0	0	0	0	0	0	0	0	0	0	0	0	0	0	0	0
82	2	4	1	Mt Claremont	4	2	5	4	1	3	3	3	5	4	4	2	3	3	3	1	1	3	3	4	5	4	4	3	3	3	4	5	5	4	2	3	4	4	4	4	4	4	4	4	4	3	3	3
83	1	6	1	Claremont	5	4	5	3	5	5	5	1	3	5	5	3	2	5	5	5	5	5	5	5	4	5	4	5	5	3	5	5	5	3	3	5	5	3	3	5	5	5	5	5	5	5	5	5
84	1	1	2	Wembley	4	4	3	5	3	3	3	2	2	3	3	1	2	4	4	3	3	3	2	2	4	4	5	4	3	3	3	3	4	3	4	4	4	4	4	4	4	0	0	4	0	4	4	4
85	1	5	2	Tuart Hill	5	3	3	4	3	4	4	2	4	4	4	3	2	4	4	3	3	3	3	2	4	4	4	4	3	4	0	4	4	3	4	4	4	3	3	4	4	3	3	3	3	3	4	4
86	2	4	1	Claremont	5	5	5	5	5	5	5	NR	3	NR	NR	5	5	4	4	4	4	3	5	5	5	5	0	0	0	0	0	0	0	0	0	0	0	0	0	0	0	0	0	0	0	0	0	0
87	1	6	1	Claremont	4	NR	NR	NR	5	NR	4	NR	4	NR	NR	5	NR	NR	5	5	NR	NR	5	4	5	NR	0	0	0	0	0	0	0	0	0	0	0	0	0	0	0	0	0	0	0	0	0	0
88	1	6	1	Claremont	5	5	5	NR	5	5	1	5	4	4	NR	NR	NR	NR	NR	5	NR	NR	NR	5	5	NR	4	4	3	0	3	4	4	0	2	2	2	2	2	0	0	2	0	4	2	0	0	3
89	1	3	5	New Zealand	5	4	5	5	5	5	4	3	5	5	5	5	5	4	5	5	5	5	5	5	5	5	5	3	3	4	3	5	4	4	4	4	4	3	4	4	4	3	5	4	3	3	5	4
90	1	2	2	Mt Pleasant	4	3	3	3	4	4	3	3	4	4	4	4	3	3	4	4	4	3	2	3	4	4	3	3	3	3	3	4	4	4	4	4	4	4	4	4	4	3	4	3	3	3	4	4
91	2	4	2	Greenfields	4	3	1	NR	4	4	4	1	2	5	5	4	2	4	5	1	1	4	2	4	4	5	3	4	5	0	1	4	4	3	4	3	4	3	4	2	3	1	1	4	2	4	4	2
92	1	1	1	NR	5	2	2	4	3	5	2	NR	5	5	5	3	3	3	5	3	5	1	1	5	5	5	4	4	4	3	2	5	4	0	1	4	5	3	3	3	4	0	1	2	2	5	4	3
93	2	4	1	Swanbourne	4	3	3	3	3	3	4	3	3	4	4	5	4	4	4	2	4	4	3	3	4	5	4	3	3	3	3	4	4	4	3	4	4	4	5	4	4	3	4	3	3	3	4	5
94	2	1	1	Mt Claremont	5	4	5	NR	5	5	5	3	5	5	4	4	4	5	5	4	5	5	NR	3	5	5	4	5	5	0	4	5	4	3	1	3	4	3	3	4	3	4	4	5	0	3	5	5
95	2	1	1	Mt Claremont	4	4	5	2	4	4	5	4	4	4	4	4	5	3	4	4	5	5	2	4	4	4	4	4	5	3	3	4	5	4	3	4	5	4	5	4	4	3	5	5	3	4	4	4
96	1	4	1	Swanbourne	5	3	4	3	2	3	3	4	4	5	5	5	5	3	5	3	4	4	3	4	5	5	4	4	4	4	0	4	4	4	3	4	4	4	4	3	4	3	4	3	4	4	4	4
97	1	3	1	Mt Claremont	4	4	5	4	5	4	5	3	5	5	5	4	5	3	5	5	5	4	1	5	5	5	4	4	5	4	5	4	3	4	3	5	5	4	4	4	5	3	5	4	3	5	5	4
98	3	4	1	Claremont	5	2	4	1	5	2	5	1	5	5	5	4	3	4	5	5	5	5	2	3	5	5	4	4	4	4	2	4	5	5	1	3	4	5	3	4	4	1	5	5	3	4	5	5
99	1	6	2	Mt Hawthorn	5	4	5	3	5	4	3	2	3	5	5	3	3	4	5	5	5	3	2	3	4	5	4	3	3	4	5	4	0	0	3	4	4	0	3	3	2	3	4	0	0	0	4	4
100	1	5	1	Claremont	5	3	2	4	5	5	4	4	2	5	4	5	3	3	5	5	4	5	3	4	5	5	4	3	4	4	1	2	2	4	3	2	2	3	2	3	4	1	2	3	3	4	2	2
101	2	4	1	Claremont	4	1	2	3	5	NR	2	2	4	5	5	3	4	3	4	5	5	3	3	3	4	4	4	4	4	3	2	0	4	3	3	3	4	3	4	4	4	1	3	4	3	3	4	4
102	2	5	1	Swanbourne	5	3	3	3	5	4	4	1	5	3	5	4	3	4	4	5	2	4	4	3	5	5	3	4	4	4	2	3	2	3	1	3	3	4	4	4	4	2	4	4	4	2	4	4
103	2	1	1	Claremont	3	4	5	3	5	5	4	3	5	4	4	4	4	3	5	5	4	4	4	4	4	4	4	4	5	3	3	5	5	4	5	5	5	5	5	4	4	2	4	5	5	5	5	5
104	1	5	1	Mt Claremont	4	4	3	3	NR	4	3	1	3	4	5	4	3	3	5	NR	5	NR	NR	4	5	5	4	3	3	4	0	4	4	5	3	3	3	4	4	4	2	0	4	0	0	5	4	4
105	1	5	1	Mt Claremont	4	3	4	4	4	4	4	4	4	4	4	3	3	4	5	3	4	4	5	5	5	5	0	0	0	0	0	0	0	0	0	0	0	0	0	0	0	0	0	0	0	0	0	0
106	1	6	1	Swanbourne	3	4	4	3	4	3	3	NR	3	4	5	3	3	3	5	4	4	3	3	3	3	5	4	3	4	4	4	4	3	0	4	4	5	3	3	3	3	4	4	4	4	4	4	4
107	2	3	1	Mt Claremont	3	4	2	2	2	4	4	3	3	5	5	3	2	4	5	2	2	2	2	5	3	3	4	4	3	3	3	4	5	3	3	5	5	0	3	4	5	3	3	3	0	4	3	0
108	2	3	1	Claremont	4	3	1	3	1	5	3	3	5	2	5	5	4	2	5	1	1	4	3	1	4	4	5	3	1	3	3	4	3	3	4	2	5	5	4	2	5	2	2	4	3	1	2	3
109	1	6	1	Swanbourne	5	4	5	5	5	5	5	4	5	5	5	4	5	4	5	4	5	5	3	5	5	5	5	3	5	3	2	5	5	3	5	5	5	4	5	4	5	2	5	5	4	5	5	5
110	1	4	1	Swanbourne	4	4	3	5	NR	4	4	NR	4	5	5	5	3	5	NR	3	3	5	5	5	5	5	5	3	3	3	0	4	4	0	3	3	4	3	4	3	0	3	1	2	4	4	2	4
111	2	4	1	Mt Claremont	4	4	3	3	2	4	2	4	4	4	4	3	2	4	4	2	4	4	2	4	4	4	3	4	4	4	4	5	4	4	4	4	4	4	4	4	4	4	4	4	4	2	4	4
112	1	5	2	Marmion	5	3	1	4	1	4	1	1	4	5	5	5	4	4	4	1	1	4	5	3	5	5	4	4	4	4	4	4	4	4	4	3	4	5	4	4	4	4	4	4	1	3	4	4
113	NR	NR	1	Swanbourne	NR	NR	NR	NR	NR	NR	NR	NR	NR	NR	NR	NR	NR	NR	NR	NR	NR	NR	NR	NR	NR	NR	0	0	0	0	0	0	0	0	0	0	0	0	0	0	0	0	0	0	0	0	0	0
114	1	6	2	Daglish	4	1	3	4	1	4	4	1	4	5	5	1	1	4	5	1	3	1	1	1	4	5	5	5	5	5	5	5	5	5	5	5	5	5	5	5	5	5	5	5	5	5	5	5
115	1	6	1	NR	4	4	4	4	4	4	4	3	5	5	5	3	3	5	5	2	2	4	4	4	4	5	4	4	4	4	4	4	4	4	4	4	4	4	4	4	4	4	4	4	4	4	4	4
116	2	6	1	Mt Claremont	5	4	3	NR	2	5	5	5	4	4	4	5	4	5	5	4	5	5	4	5	5	5	5	3	4	0	2	5	4	4	4	4	4	5	4	4	4	4	3	5	4	4	5	4
117	1	3	1	Claremont	4	2	5	4	2	3	2	1	3	4	5	3	2	3	5	2	2	4	4	4	4	5	3	3	4	3	3	3	3	3	4	4	4	4	3	3	4	3	3	4	4	4	4	4
118	2	4	1	Swanbourne	4	3	5	2	5	5	2	3	5	5	4	5	1	1	5	5	3	3	5	5	5	4	3	4	3	3	2	4	1	3	2	3	3	3	3	4	4	2	3	3	3	2	4	3
119	1	4	1	Swanbourne	4	4	4	3	4	4	2	2	4	4	4	4	4	3	4	4	4	4	4	4	4	4	4	2	3	3	2	3	2	3	2	2	3	4	4	3	4	1	4	2	4	4	3	4
120	1	6	1	Swanbourne	2	5	1	3	1	5	4	1	4	5	5	5	NR	5	5	1	1	3	1	3	5	5	4	3	0	4	0	5	4	5	3	5	5	5	0	3	5	0	0	3	1	3	5	5
121	1	6	1	Mt Claremont	5	5	NR	3	5	5	4	2	2	5	4	3	4	4	5	5	5	NR	NR	2	5	4	4	4	0	4	4	5	5	4	2	2	5	5	4	4	4	3	5	0	0	3	5	4
122	2	2	1	Claremont	5	5	5	5	5	5	5	5	5	5	5	5	5	5	5	5	5	5	5	5	5	5	5	5	5	5	5	5	5	5	3	5	5	5	5	5	5	5	5	5	5	5	5	5
123	2	6	1	Mt Claremont	3	3	3	3	3	3	3	3	3	3	3	3	3	3	3	4	3	3	3	3	3	3	3	3	3	3	3	3	3	3	3	3	3	3	3	3	3	3	3	3	3	3	3	3
124	2	3	1	Mt Claremont	4	2	4	2	2	2	3	3	4	5	5	4	4	3	5	2	2	4	4	4	4	5	4	4	4	4	4	4	4	4	4	4	4	4	4	4	4	4	4	4	4	4	4	4
125	1	6	1	Swanbourne	4	5	5	5	5	4	4	5	5	4	4	5	5	5	3	4	5	5	5	4	5	3	4	0	3	4	1	4	4	2	1	3	4	3	3	3	3	0	0	0	5	4	5	3
126	1	5	1	Claremont	4	3	4	4	4	4	3	3	5	5	4	3	3	3	3	5	4	3	3	3	5	5	4	3	3	3	5	4	3	3	3	4	4	3	3	3	3	5	4	4	4	3	4	5
127	1	3	1	Mt Claremont	5	3	4	1	5	5	4	3	4	5	NR	2	3	3	5	5	5	3	1	2	5	5	3	4	4	5	3	4	5	5	3	3	0	5	5	5	4	2	5	5	5	4	5	5
128	2	4	1	NR	3	3	1	3	4	4	4	4	4	4	4	2	2	4	4	4	4	4	1	2	4	4	3	2	4	4	3	4	4	4	3	4	4	2	4	4	4	4	4	2	3	4	4	4
129	2	6	1	Claremont	4	5	4	3	4	4	2	2	4	5	5	4	3	3	4	4	4	3	2	4	4	5	4	4	4	3	4	4	2	2	4	5	5	4	3	3	4	4	4	3	2	4	4	5
130	1	4	1	Claremont	2	4	4	4	4	4	2	1	3	5	4	3	3	3	5	4	4	4	4	4	5	5	4	0	0	0	4	4	0	0	3	4	4	0	0	0	4	1	4	0	0	0	3	0
131	2	6	1	Claremont	3	3	1	1	1	5	5	1	5	5	5	3	1	3	5	1	1	1	1	1	1	4	4	4	0	0	0	5	3	0	5	5	5	3	0	3	5	0	0	0	0	0	0	4
132	2	4	1	Mt Claremont	3	2	4	2	4	4	2	2	3	4	4	2	2	4	4	3	4	4	2	4	2	2	4	4	3	4	4	4	2	4	3	4	4	3	4	3	3	4	4	4	3	3	4	4
133	1	5	3	Bunbury	3	5	3	3	1	4	1	1	3	5	5	1	3	5	5	1	1	1	1	1	3	3	3	3	3	3	3	3	3	3	3	3	3	3	3	3	3	3	3	3	3	3	3	3
134	1	3	1	Nedlands	3	2	3	2	4	4	4	2	3	5	5	2	3	3	5	5	5	1	1	2	5	5	4	0	4	3	4	4	4	0	3	3	3	0	4	3	4	4	4	0	0	0	4	4
135	2	6	3	Bunbury	4	5	3	3	1	1	4	3	2	5	5	1	2	4	5	1	1	1	1	1	3	4	5	4	4	4	4	4	4	4	4	4	4	3	4	4	5	4	4	4	4	4	3	3
136	1	6	1	Claremont	4	5	3	4	5	5	4	2	5	5	5	5	5	4	5	5	5	4	3	4	5	5	4	5	3	4	1	4	4	1	3	5	5	5	5	4	5	1	5	4	3	4	2	4
137	1	3	1	Mt Claremont	4	4	5	2	5	4	2	4	4	4	4	5	4	2	4	5	4	3	3	4	4	4	4	4	4	3	NR	4	4	3	2	3	3	3	3	3	4	2	4	3	3	3	2	3
138	2	5	1	Claremont	4	1	3	1	1	5	2	2	3	5	5	3	3	1	5	1	1	3	4	4	3	5	4	0	3	0	0	5	3	3	4	4	4	4	4	3	4	0	0	4	4	4	4	4
139	2	3	1	wembley	4	2	4	3	1	4	4	1	4	3	4	4	4	4	4	1	1	4	1	4	5	4	3	4	3	3	3	3	4	3	4	4	4	3	4	3	4	3	3	4	3	3	3	3
140	1	2	2	Kinross	4	3	5	4	2	4	4	4	4	4	4	4	4	4	4	3	3	4	3	4	4	4	5	3	4	3	3	4	3	3	3	3	4	4	3	3	4	3	3	3	3	4	4	4
141	2	6	1	Swanbourne	4	4	2	3	2	4	4	4	4	5	5	4	3	3	5	3	3	4	2	4	5	5	4	4	3	4	4	4	4	4	3	3	4	5	3	4	4	3	3	4	3	3	3	4
142	2	2	2	Duncraig	5	4	5	5	5	5	5	5	5	5	5	3	5	5	5	5	5	5	3	5	5	5	5	4	5	5	5	5	5	5	5	5	5	3	5	5	5	5	5	5	3	5	5	5
143	1	2	2	Yokine	4	3	1	4	5	4	2	2	5	5	5	2	5	2	3	5	5	2	2	2	5	3	5	3	4	0	3	3	4	0	3	5	3	0	2	0	4	0	4	0	0	3	5	5
144	2	2	2	Yokine	3	3	3	3	3	3	3	3	3	3	3	3	3	3	3	3	3	3	3	3	3	3	3	3	3	3	3	3	3	3	3	3	3	3	3	3	3	3	3	3	3	3	3	3
145	1	2	2	Duncraig	5	3	1	3	3	5	2	2	5	5	5	2	5	3	3	4	4	3	2	4	4	3	3	3	0	3	2	1	2	3	3	3	3	4	2	3	3	3	4	2	0	3	3	3
146	1	6	1	Mt Claremont	5	5	3	NR	1	5	5	3	3	5	5	5	3	3	5	1	5	5	4	2	5	5	2	2	3	0	1	4	4	1	1	1	3	3	3	3	2	5	1	4	3	4	3	3
147	2	6	1	Claremont	4	1	1	1	5	4	1	1	5	5	3	1	4	1	1	3	3	5	1	2	5	1	0	0	0	0	0	0	0	0	0	0	0	0	0	0	0	0	0	0	0	0	0	0
148	2	4	1	Swanbourne	3	2	2	1	5	NR	1	1	3	3	3	1	1	3	4	5	5	4	1	1	5	4	4	4	4	4	1	4	4	4	4	4	4	4	4	4	4	1	1	4	4	4	4	4
149	1	3	1	Mt Claremont	4	3	5	3	2	4	4	2	5	5	5	5	4	3	5	2	3	5	5	4	5	5	4	4	4	3	2	4	4	3	3	4	4	4	3	3	4	3	3	4	4	4	3	4
150	2	3	1	Mt Claremont	2	3	4	2	1	3	3	2	4	4	4	4	3	2	5	1	1	4	3	1	4	3	4	4	4	4	1	4	3	4	3	4	4	4	2	4	5	1	1	4	2	2	3	3
151	2	6	1	Claremont	4	NR	2	NR	3	NR	NR	4	3	NR	4	NR	NR	3	5	4	4	NR	4	NR	4	4	4	0	3	0	3	0	0	3	3	0	3	0	0	3	4	2	2	0	4	0	3	4
152	2	3	2	Fremantle	5	2	4	2	3	4	3	2	4	4	4	5	4	3	5	4	4	2	1	2	4	4	3	1	3	3	3	4	2	2	1	0	3	2	3	2	2	3	4	2	1	2	2	2
153	2	3	1	Swanbourne	4	2	4	4	2	4	4	4	4	4	4	4	4	4	4	1	1	4	4	3	5	4	4	3	3	3	3	3	3	3	4	4	4	3	3	4	3	0	0	2	0	3	5	4
154	1	3	2	Beaconsfield	5	3	4	3	4	4	3	3	5	5	5	4	3	4	5	5	5	2	1	3	5	5	5	0	4	3	0	4	4	3	4	4	4	4	4	4	4	4	4	0	0	0	4	5
155	1	3	1	Swanbourne	5	3	5	4	3	5	5	3	5	5	5	5	5	5	5	1	3	5	5	5	5	5	5	4	5	4	3	5	5	4	4	4	4	4	4	4	5	4	5	5	4	4	4	5
156	2	4	1	Swanbourne	5	1	5	4	1	4	4	3	5	4	5	5	5	4	5	1	1	5	5	5	5	5	4	0	4	4	0	4	4	3	1	3	4	3	4	3	3	5	5	4	3	3	4	5
157	2	6	1	Claremont	5	4	5	4	5	5	3	2	4	5	5	4	4	5	5	4	5	5	4	3	4	4	5	4	4	4	3	5	3	0	3	2	4	4	4	4	4	3	5	3	3	3	4	4
158	1	6	5	Great Britain	4	NR	5	NR	4	3	NR	NR	4	NR	NR	4	NR	NR	NR	4	4	NR	NR	NR	NR	5	0	0	0	0	0	0	0	0	0	0	0	0	0	0	0	0	0	0	0	0	0	0
159	2	6	5	England	5	5	4	NR	4	NR	5	5	3	3	4	NR	3	NR	4	NR	4	4	4	4	4	4	5	5	4	0	4	0	5	5	3	0	4	0	3	0	4	0	3	4	4	4	4	5
160	2	3	1	Claremont	5	4	5	3	5	3	2	1	4	4	4	3	3	3	5	5	5	3	1	4	5	5	2	3	3	3	3	3	3	3	2	2	2	3	4	3	3	2	4	0	2	4	4	3
161	1	5	1	NR	5	4	2	3	5	5	3	1	4	5	5	3	1	4	5	5	3	4	1	1	3	5	4	4	4	2	3	5	3	5	3	5	5	3	3	2	4	3	3	5	3	3	5	4
162	1	3	1	Claremont	5	3	3	NR	5	5	3	1	4	4	5	4	2	2	4	5	5	2	2	3	5	4	3	3	3	4	3	5	3	3	2	4	4	4	4	0	3	3	3	4	0	5	2	4
163	1	6	1	NR	5	5	5	5	5	5	4	4	5	5	5	4	4	3	4	5	5	3	3	4	5	5	4	4	5	4	3	4	4	0	4	3	4	5	3	4	4	3	4	5	5	4	4	4
164	1	6	2	Cottesloe	4	4	4	4	4	4	4	4	4	5	5	4	4	4	5	4	4	4	4	4	4	4	0	0	0	0	0	0	0	0	0	0	0	0	0	0	0	0	0	0	0	0	0	0
165	1	4	2	Dalkeith	5	4	3	3	4	4	3	4	4	4	4	3	3	4	3	NR	4	4	4	3	3	4	3	3	3	3	3	3	2	4	2	3	4	4	2	2	3	0	4	4	4	2	3	4
166	2	5	1	Claremont	5	1	1	1	5	1	1	1	2	5	5	5	5	1	5	5	5	NR	5	1	5	5	5	0	0	0	3	5	0	0	3	4	5	3	3	0	1	1	3	0	1	0	5	3
167	2	5	2	Dalkeith	4	1	2	2	5	4	1	1	4	2	3	5	4	2	2	5	5	1	4	3	4	4	3	0	0	0	2	3	0	0	3	3	3	3	3	3	3	2	3	0	2	3	4	3
168	1	5	2	North Perth	5	2	1	1	1	4	4	2	2	5	5	5	3	2	5	1	1	4	5	1	1	1	4	4	5	5	5	4	5	4	4	3	4	4	4	4	4	0	0	4	4	4	4	4
169	1	5	2	South Perth	4	1	1	3	1	4	3	3	4	4	4	4	4	3	2	1	1	4	5	2	5	4	0	0	0	0	0	0	0	0	0	0	0	0	0	0	0	0	0	0	0	0	0	0
170	1	4	1	Claremont	5	3	1	3	5	5	5	3	5	5	5	5	1	3	5	5	5	5	2	5	4	5	3	3	0	3	0	4	5	4	3	2	5	5	0	3	3	0	0	5	0	0	4	4
171	2	6	1	Swanbourne	4	3	2	2	1	4	4	2	3	5	5	4	3	2	4	2	2	2	4	2	4	5	4	4	4	4	4	4	4	3	3	4	4	3	3	3	4	2	2	2	4	2	2	3
172	1	6	1	Swanbourne	5	3	4	4	2	4	5	2	4	5	5	5	3	3	5	1	1	2	4	3	5	5	3	3	3	3	3	4	3	2	2	2	3	3	4	3	3	5	5	3	4	4	4	3
173	1	4	1	Mt Claremont	4	3	NR	3	NR	4	2	NR	3	4	4	4	1	3	5	1	1	1	1	1	4	4	3	3	0	3	0	4	3	0	3	3	3	4	0	3	4	0	0	0	0	0	4	4
174	2	6	4	Melbourne	NR	4	NR	NR	NR	NR	NR	NR	NR	4	4	NR	NR	NR	NR	NR	NR	NR	NR	NR	NR	NR	0	4	0	0	0	0	0	0	0	3	4	0	0	0	0	0	0	0	0	0	0	0
175	1	6	4	Melbourne	4	4	2	4	2	4	4	3	3	3	4	NR	3	4	4	2	2	2	3	2	2	4	4	3	0	2	0	4	2	4	3	3	4	0	3	2	4	0	0	0	3	0	0	4
176	2	6	1	Claremont	4	5	5	3	4	4	4	4	4	5	5	4	3	5	5	4	4	4	5	5	4	5	3	4	4	2	4	5	4	3	3	5	4	4	5	2	4	5	5	5	2	3	5	2
177	2	3	1	Swanbourne	4	4	3	3	4	5	2	1	5	4	5	5	4	3	5	4	5	4	2	4	5	5	4	5	5	5	5	5	4	4	5	4	0	5	5	5	5	5	4	4	2	3	5	4
178	1	4	1	Claremont	5	4	3	4	5	5	2	2	4	5	5	4	4	2	5	4	3	1	1	4	5	4	5	3	3	2	3	5	3	4	2	5	5	2	3	4	5	2	3	5	5	3	5	4
179	1	1	1	Claremont	5	4	2	4	5	5	4	3	4	5	5	1	3	4	5	5	5	1	1	4	5	5	5	5	0	4	3	3	4	0	3	4	4	0	4	4	3	2	4	0	0	3	5	3
180	1	2	2	Applecross	4	3	4	4	4	4	3	3	4	4	4	3	3	4	4	4	4	3	2	3	4	4	3	4	4	2	3	4	4	4	4	4	4	4	4	2	3	3	3	3	3	3	3	4
181	2	6	1	Mt Claremont	5	3	4	2	1	NR	2	3	4	5	NR	2	2	4	5	1	1	3	4	3	4	5	3	3	3	3	5	0	2	2	4	2	0	3	3	3	4	5	5	3	4	4	2	4
182	1	6	1	Mt Claremont	5	3	4	4	NR	4	1	4	5	5	5	5	3	4	4	NR	NR	5	5	5	5	5	2	3	3	3	0	3	2	3	3	3	3	3	3	2	3	0	0	4	4	4	4	4
183	1	6	1	Mt Claremont	4	3	3	5	5	5	5	2	4	5	5	5	4	4	5	4	5	3	3	4	5	5	4	0	0	4	3	5	3	0	0	2	4	0	3	4	4	3	2	0	0	0	3	4
184	1	4	1	Mt Claremont	4	NR	2	NR	4	5	4	NR	4	3	4	NR	3	NR	4	4	5	3	NR	3	5	4	4	0	4	0	4	5	4	0	4	4	4	0	4	0	4	5	5	3	0	4	4	4
185	2	5	1	Mt Claremont	5	4	5	4	3	5	5	4	5	5	5	4	4	4	5	4	4	4	4	4	4	5	5	4	5	4	3	5	5	4	5	5	5	4	4	4	5	4	4	4	4	4	4	5
186	1	5	2	Daglish	5	3	4	5	4	4	4	4	4	4	4	4	3	4	4	4	4	4	3	4	4	5	5	4	3	2	4	3	0	0	3	4	3	3	2	3	3	4	4	4	3	3	0	5
187	1	4	1	Swanbourne	NR	NR	NR	NR	NR	NR	NR	NR	NR	NR	NR	NR	NR	NR	NR	NR	NR	NR	NR	NR	NR	NR	5	5	5	4	5	5	5	4	4	4	4	4	4	4	4	4	4	4	4	4	4	4
188	1	6	1	Mt Claremont	4	4	4	3	4	4	3	5	4	5	3	4	4	3	4	4	4	NR	NR	NR	NR	4	3	3	3	2	2	3	3	5	3	5	3	3	3	4	3	2	2	5	5	5	3	3
189	1	6	1	Swanbourne	3	4	5	4	NR	5	4	2	3	5	5	4	3	4	5	4	NR	4	5	4	5	5	3	2	4	3	0	4	5	5	3	3	3	4	3	4	0	3	0	3	0	4	5	3
190	1	5	1	Nedlands	4	5	1	4	5	5	5	4	4	4	5	4	4	3	5	NR	5	3	3	4	4	5	4	4	0	3	4	0	3	3	4	3	5	3	4	4	0	4	5	5	3	0	3	5
191	3	6	1	Nedlands	4	3	4	3	2	4	4	1	2	4	4	3	3	3	4	NR	2	4	NR	4	4	3	4	4	4	4	4	4	4	4	5	4	4	5	4	4	4	4	4	4	4	4	4	4
192	1	6	1	Swanbourne	5	5	4	4	4	5	5	5	5	5	5	5	5	5	5	5	5	5	5	5	5	5	4	4	4	4	4	5	5	5	5	5	5	5	5	5	5	5	5	5	5	5	5	5
193	1	3	2	Myaree	5	4	3	3	4	3	4	1	4	5	5	1	1	4	5	1	1	2	1	1	5	5	4	3	3	3	4	3	3	3	2	3	4	2	3	2	3	3	3	3	3	2	4	3
194	1	6	1	Claremont	5	4	5	5	5	5	3	1	5	5	5	5	5	5	5	5	5	1	1	4	5	5	3	3	3	4	4	5	4	4	4	4	4	4	4	4	5	5	5	5	5	4	5	5
195	2	4	1	Swanbourne	4	3	1	3	4	4	2	2	4	4	5	4	4	4	5	4	4	2	3	2	3	4	4	3	0	2	4	4	2	3	3	3	4	3	3	2	3	3	4	3	2	3	3	3
196	1	5	1	Mt Claremont	5	5	5	5	5	5	3	1	4	5	5	2	2	4	5	3	3	4	3	3	5	5	4	4	3	3	5	5	3	4	4	4	3	4	4	3	3	4	4	4	3	3	4	4
197	1	5	1	Swanbourne	5	NR	NR	4	5	4	2	1	5	5	5	4	2	4	5	4	4	2	3	4	5	4	4	0	0	3	4	4	4	2	3	4	3	3	3	2	2	3	3	3	3	3	4	4
198	1	4	1	Swanbourne	5	3	2	3	4	4	5	1	2	5	5	2	2	5	5	4	5	4	3	2	1	5	3	4	4	2	2	5	3	2	3	4	3	3	3	1	2	2	2	2	3	4	5	2
199	2	5	1	Claremont	5	4	1	3	2	4	2	3	1	4	4	1	4	3	4	1	2	1	1	2	1	4	2	2	1	3	2	2	2	3	3	2	2	3	2	3	2	3	3	3	3	3	3	3
200	2	6	1	Claremont	3	2	2	2	5	2	2	1	2	3	3	2	2	2	5	3	5	2	2	3	3	3	4	4	4	4	4	4	4	4	4	4	4	3	3	4	4	4	4	4	4	4	4	4
201	1	5	1	Mt Claremont	5	5	4	5	4	5	3	4	5	5	5	4	4	4	5	4	4	3	5	4	5	5	4	3	4	4	4	4	3	3	4	2	3	4	4	4	4	3	4	3	4	4	4	4
202	1	6	1	Mt Claremont	5	5	4	4	4	2	4	4	4	5	5	5	4	4	4	1	3	4	3	4	5	5	5	0	4	4	2	2	4	4	1	5	5	5	4	3	3	0	3	3	0	3	3	0
203	1	6	1	Mt Claremont	4	1	3	2	NR	3	4	1	3	4	5	NR	2	2	5	NR	NR	1	1	2	2	5	3	3	4	5	0	5	3	5	3	3	3	0	5	3	1	0	0	5	5	3	4	2
204	1	5	1	Claremont	NR	NR	NR	NR	NR	NR	NR	NR	NR	NR	NR	NR	NR	NR	NR	NR	NR	NR	NR	NR	NR	NR	0	0	0	0	0	0	0	0	0	0	0	0	0	0	0	0	0	0	0	0	0	0
205	1	5	1	Claremont	5	5	5	5	5	5	5	4	5	1	4	5	3	3	3	5	5	5	5	5	5	5	5	5	5	5	1	3	3	3	4	0	4	3	4	3	4	2	4	4	4	4	4	5
206	1	6	1	Claremont	4	3	1	2	4	4	3	NR	3	NR	3	3	2	3	4	3	NR	1	3	2	NR	4	4	3	0	4	4	4	3	0	4	0	3	4	4	3	4	0	5	0	4	0	0	4
207	1	5	2	Floreat	4	NR	NR	4	5	4	NR	NR	4	5	5	4	NR	NR	NR	5	5	4	5	5	5	5	4	0	0	0	4	4	0	0	4	3	4	4	0	0	0	4	4	4	4	3	4	4
208	2	4	3	Kalgoorlie	5	3	4	3	2	4	2	3	5	5	5	5	3	4	5	1	5	5	3	5	4	5	4	3	4	3	0	4	3	3	3	4	3	2	4	3	4	5	3	3	0	3	4	5
209	1	4	3	Kalgoorlie	4	4	4	4	4	4	3	3	4	5	5	5	4	5	5	4	5	5	5	3	5	5	4	3	3	4	3	0	4	0	0	2	4	0	0	3	4	0	0	3	0	3	4	0
210	1	4	1	Swanbourne	5	5	NR	NR	2	4	4	2	NR	4	5	3	2	3	5	1	4	5	5	5	5	5	4	5	0	0	0	0	0	0	0	3	4	4	0	0	4	0	4	4	4	3	4	4
211	2	5	1	Swanbourne	4	NR	NR	NR	4	4	4	NR	NR	5	NR	NR	NR	NR	4	NR	NR	NR	NR	NR	4	NR	4	0	0	0	4	4	4	0	0	0	0	0	0	0	4	0	0	0	0	0	4	0
212	1	5	1	South Fremantle	3	NR	NR	NR	NR	4	4	NR	5	5	5	NR	5	NR	5	5	5	5	NR	NR	5	5	0	0	0	0	0	0	0	0	0	0	0	0	0	0	0	3	0	0	0	0	0	0
213	2	6	1	Claremont	3	3	NR	4	1	3	NR	NR	4	4	4	4	3	3	4	4	4	1	3	1	4	4	0	0	0	0	0	0	0	0	0	0	0	0	0	0	0	0	0	0	0	0	0	0
214	2	4	1	Mt Claremont	3	2	3	1	1	4	3	2	3	4	4	4	4	2	5	1	1	3	2	4	4	4	5	4	4	5	0	5	4	4	3	3	4	3	4	4	3	0	0	4	4	3	5	3
215	1	3	1	Swanbourne	4	3	2	3	1	3	3	2	3	4	5	4	3	4	5	1	1	4	1	2	4	5	3	4	4	4	4	4	4	4	4	4	4	4	3	4	4	3	0	4	0	0	3	3
216	1	3	1	Claremont	4	2	5	2	5	4	3	1	5	5	5	3	4	2	4	5	5	4	2	3	4	4	3	3	4	3	1	4	3	0	3	4	4	3	3	3	4	1	4	4	3	3	4	4
217	1	6	1	Claremont	5	3	4	4	5	4	5	5	3	NR	4	5	5	3	5	5	NR	5	5	3	5	5	5	4	4	4	5	4	5	5	4	0	4	5	5	3	5	5	0	5	5	4	5	5
218	1	3	1	Claremont	4	4	4	4	1	4	4	4	4	4	4	4	4	4	4	1	1	4	1	4	4	4	4	4	4	4	4	4	4	4	4	4	4	4	4	4	4	5	5	4	5	4	4	4
219	1	6	1	Claremont	5	3	3	3	4	4	5	3	5	4	NR	5	4	4	5	5	5	4	4	4	5	5	5	4	4	3	3	3	5	3	1	4	0	3	3	3	4	5	5	3	3	4	4	4
220	2	5	1	Claremont	3	2	2	2	5	5	3	3	2	5	5	4	5	4	5	5	5	3	3	4	4	4	4	4	5	5	2	4	3	3	4	4	4	3	3	3	4	3	3	3	3	3	3	3
221	1	6	1	Swanbourne	4	4	5	5	5	5	3	4	4	4	4	4	4	4	4	5	5	5	5	4	4	4	4	4	4	4	4	4	4	4	4	4	4	4	4	4	4	4	4	4	4	4	4	4
222	2	6	1	Swanbourne	4	4	4	NR	5	4	2	2	3	5	4	4	4	3	4	4	5	4	5	4	4	4	3	3	4	0	2	3	2	3	3	3	3	3	3	3	3	3	4	3	3	3	3	2
223	2	6	4	Sydney	3	3	1	1	1	4	4	1	3	4	4	1	3	3	4	1	1	1	1	1	3	4	0	0	0	0	0	0	0	0	0	0	0	0	0	0	0	0	0	0	0	0	0	0
224	2	3	1	Claremont	3	2	5	1	3	5	4	5	5	5	5	5	3	4	5	3	3	5	3	4	5	5	5	5	5	5	5	5	5	5	5	5	5	5	5	5	5	5	5	5	5	5	5	5
225	2	6	1	Claremont	4	4	2	3	2	4	NR	5	4	5	NR	4	3	4	4	2	NR	2	3	4	4	4	4	4	4	3	4	4	4	4	4	3	4	4	4	4	5	4	4	5	5	4	5	4
226	2	5	1	Swanbourne	3	4	2	3	5	4	3	1	3	5	5	5	3	3	5	5	3	2	2	3	4	5	5	4	4	4	3	4	4	4	3	5	5	3	4	4	4	2	4	3	3	4	4	4
227	1	4	1	Swanbourne	4	4	5	3	5	4	4	2	4	5	5	4	4	4	5	4	4	5	2	4	4	5	5	5	4	4	1	3	4	5	3	4	4	4	4	4	4	2	4	5	5	4	3	5
228	1	6	1	Claremont	4	4	4	3	4	4	3	2	4	3	4	5	NR	3	4	4	4	3	5	5	4	5	4	0	0	3	4	4	4	2	4	3	4	5	0	3	4	4	3	3	5	5	4	4
229	1	6	1	Swanbourne	5	1	3	2	5	1	1	1	3	NR	5	NR	NR	1	5	5	1	5	1	1	5	5	3	4	5	5	3	4	1	5	3	0	4	0	0	0	4	3	1	0	1	1	0	0
230	1	5	1	Claremont	4	4	5	4	4	3	0	5	4	5	5	4	5	5	5	5	5	3	3	4	4	5	3	2	3	4	3	3	0	2	3	3	3	3	3	3	4	4	4	3	3	4	3	4
231	2	2	1	Claremont	3	4	4	3	3	4	4	2	3	4	4	1	3	3	4	3	3	1	1	3	4	4	3	4	4	4	4	3	3	3	4	5	4	3	4	3	5	3	3	3	3	3	4	4
232	1	4	1	Claremont	3	4	2	2	2	4	2	2	2	3	4	2	1	1	5	2	4	2	3	3	3	4	4	4	4	4	4	4	4	4	4	4	4	4	4	4	4	4	4	4	4	4	4	4
233	2	5	1	Swanbourne	3	3	4	0	5	4	4	3	4	4	3	3	3	3	4	5	4	3	3	4	4	4	4	3	4	0	3	4	4	3	4	4	3	3	3	3	4	2	4	3	3	4	4	4
234	1	2	1	Claremont	5	2	1	4	5	3	4	2	4	4	3	2	3	3	4	4	4	4	1	1	5	5	4	0	0	2	2	3	2	0	1	4	4	4	3	2	5	2	5	4	0	0	3	1
235	2	2	1	Claremont	5	3	1	2	5	3	4	3	3	2	4	3	3	4	4	5	5	2	1	2	5	3	5	4	0	0	4	4	4	4	3	4	4	3	4	2	4	4	4	4	0	3	4	4
236	2	4	1	Claremont	4	3	2	4	4	4	2	2	4	3	4	3	4	4	4	4	3	3	2	3	4	4	4	4	4	4	3	4	4	4	3	4	3	2	3	3	3	3	4	3	2	4	4	4
237	1	5	1	Mt Claremont	0	0	0	0	0	0	0	0	0	0	0	0	0	0	0	0	0	0	0	0	0	0	0	0	0	0	0	0	0	0	0	0	0	0	0	0	0	0	0	0	0	0	0	0
238	2	5	1	NR	5	1	1	1	1	0	1	1	1	4	5	1	5	1	5	1	1	1	1	1	5	5	0	0	0	0	0	0	0	0	0	0	0	0	0	0	0	0	0	0	0	0	0	0
239	1	3	1	Swanbourne	5	3	1	4	5	4	5	2	4	5	5	4	3	3	4	5	5	1	1	3	5	5	4	4	3	3	2	3	3	3	4	4	4	4	4	3	4	2	3	0	0	4	4	4
240	1	4	1	Claremont	5	5	5	5	5	5	5	0	4	5	5	5	0	0	5	5	5	5	5	5	5	5	5	4	3	5	3	5	5	0	4	5	5	5	0	0	4	2	5	5	5	3	4	4
241	2	5	1	Mt Claremont	3	3	3	3	4	4	3	3	5	3	3	3	3	3	0	5	5	3	2	3	3	3	3	3	3	3	3	4	3	3	2	3	3	3	0	3	0	2	2	3	3	3	4	4
242	1	4	1	Mt Claremont	5	3	3	3	5	5	4	4	4	4	4	4	4	4	4	5	5	4	4	3	5	4	5	3	3	4	2	4	2	4	4	4	4	4	4	4	4	2	5	4	4	3	4	4
243	2	3	2	Peppermint Grove	5	4	3	1	2	4	2	2	3	5	5	3	2	1	5	2	2	4	2	2	4	3	4	4	4	4	4	4	4	4	4	5	5	4	4	4	5	4	4	5	4	4	5	4
244	1	1	1	Mt Claremont	4	3	4	5	4	5	5	1	4	5	5	0	3	4	4	5	5	2	2	2	5	5	4	4	5	3	3	4	5	2	3	4	5	0	4	3	4	5	5	4	4	4	5	5
245	2	3	1	Claremont	4	3	4	5	0	4	4	0	4	5	5	4	0	0	4	0	0	0	0	4	4	5	4	3	0	3	0	5	5	0	3	3	5	4	0	0	5	0	0	0	0	4	5	5
246	1	4	1	Swanbourne	3	3	3	5	5	5	1	2	3	4	4	3	3	4	3	5	5	4	2	3	5	4	3	3	4	5	4	5	5	4	3	4	4	3	3	5	4	2	5	4	2	3	4	4
247	1	3	1	Claremont	5	3	3	4	2	3	4	1	3	5	0	3	2	4	5	2	2	3	2	4	3	3	3	4	4	3	5	5	3	4	4	3	0	4	4	3	2	4	4	4	4	3	3	2
248	2	4	1	Mt Claremont	4	4	5	4	4	5	2	1	4	5	5	5	3	5	4	3	3	5	5	3	5	5	4	4	4	2	4	4	2	2	3	4	4	4	3	2	3	3	3	5	5	4	2	4
249	2	6	1	Mt Claremont	5	5	4	5	4	5	4	5	5	4	5	4	2	4	5	2	4	5	4	5	5	5	5	4	4	5	4	5	4	5	5	3	5	4	2	4	5	3	4	5	4	5	5	5
250	1	4	1	Mt Claremont	0	0	0	0	0	0	0	0	0	0	0	0	0	0	0	0	0	0	0	0	0	0	0	0	0	0	0	0	0	0	0	0	0	0	0	0	0	0	0	0	0	0	0	0
251	1	4	1	Claremont	3	1	1	1	5	3	5	2	2	3	4	2	4	3	4	5	3	1	1	3	5	4	5	0	0	0	2	5	1	0	5	4	4	4	4	4	5	1	3	5	5	4	4	0
252	1	5	1	Claremont	0	0	0	0	0	0	0	0	0	0	0	0	0	0	0	0	0	0	0	0	0	0	0	0	0	0	0	0	0	0	0	0	0	0	0	0	0	0	0	0	0	0	0	0
253	1	1	2	Nedlands	4	4	4	3	5	4	3	3	4	5	5	3	3	3	5	4	3	4	3	4	3	5	4	4	3	3	4	3	3	3	3	4	4	3	3	3	4	4	3	3	3	3	5	4
254	1	3	1	Claremont	4	3	3	3	2	4	4	4	4	4	4	1	3	3	4	3	3	1	1	3	4	4	4	4	4	4	3	4	4	4	4	4	4	4	3	3	4	3	3	3	1	3	4	4
255	2	3	1	Swanbourne	4	4	4	2	5	4	3	1	5	3	3	1	3	3	5	4	4	4	3	3	5	4	2	2	1	3	2	3	3	5	1	3	3	5	3	3	1	2	1	4	3	3	4	4
256	1	3	1	Swanbourne	4	4	4	3	3	3	3	3	4	4	4	2	2	2	3	3	3	3	2	3	3	4	4	4	4	4	4	4	4	4	4	4	5	4	4	4	4	4	4	4	4	4	4	5
257	1	6	1	Swanbourne	4	0	4	0	0	5	0	0	0	0	4	5	0	0	0	0	0	0	0	0	0	0	0	4	0	3	3	0	4	4	3	2	0	0	4	4	4	3	4	4	4	4	4	4
258	1	6	1	Mt Claremont	4	3	1	4	1	4	4	0	1	4	0	1	1	4	4	0	1	1	4	1	4	4	4	3	0	2	0	4	4	0	0	3	0	0	0	4	4	0	0	0	4	0	3	4
259	1	2	1	Mt Claremont	5	1	3	3	4	4	2	3	4	5	5	3	2	3	5	5	3	3	2	5	5	5	4	0	3	4	4	5	4	4	5	4	5	4	3	3	5	2	4	3	3	4	5	5
260	1	3	1	Mt Claremont	3	4	2	4	2	4	3	2	2	4	4	2	2	3	4	1	1	1	1	1	4	4	4	4	4	3	4	4	3	3	4	2	3	3	0	3	4	0	0	0	0	0	4	4
261	1	1	1	Claremont	5	3	4	4	4	4	4	3	4	4	4	4	4	4	4	2	5	3	4	2	5	4	5	4	4	4	4	5	4	3	4	4	4	4	4	4	4	0	4	0	4	0	0	4
262	1	5	1	NR	5	5	3	3	1	4	1	1	5	5	5	5	5	3	3	1	1	5	5	5	5	5	4	4	4	4	4	4	4	4	4	4	4	4	4	4	4	4	4	4	4	4	4	4
263	2	4	1	Mt Claremont	3	3	2	1	1	5	2	1	4	5	5	3	4	4	5	1	1	1	4	4	5	5	4	4	4	4	4	5	5	4	4	5	5	5	5	4	5	5	5	5	5	5	5	5
264	1	4	1	Mt Claremont	3	2	2	2	2	4	4	3	3	5	5	5	3	4	5	2	2	4	2	2	5	5	4	0	4	4	0	4	4	4	4	5	4	4	4	4	4	5	5	4	4	4	4	4
265	1	6	2	City Beach	5	5	3	3	2	5	4	1	4	5	5	1	2	3	5	1	1	2	1	2	1	3	5	5	4	4	5	5	4	3	4	5	5	4	4	5	5	5	5	4	5	4	5	5
266	2	6	2	City Beach	3	4	1	3	1	4	3	2	4	4	4	3	3	4	5	1	1	2	1	2	4	5	4	4	1	4	0	4	4	4	4	4	4	4	4	4	4	0	0	4	4	4	4	4
267	1	5	1	Claremont	4	4	0	0	0	4	4	0	3	5	5	4	0	3	4	0	0	0	0	0	4	5	4	4	0	0	0	4	4	0	4	5	5	4	0	3	4	0	0	0	0	0	4	5
268	2	2	2	Inglewood	4	3	3	2	3	4	2	NR	4	4	4	4	4	2	4	3	3	4	1	2	3	4	4	4	3	3	3	4	4	3	2	3	2	3	2	2	4	3	3	3	3	3	4	4
269	1	6	1	Claremont	4	3	2	3	1	3	3	2	3	4	4	2	2	4	4	1	1	1	1	2	4	4	3	3	3	2	4	3	3	2	2	3	4	2	2	2	4	4	4	3	3	2	3	3
270	2	1	1	Swanbourne	2	1	2	3	5	4	2	4	5	2	5	5	3	2	5	4	5	5	1	1	5	4	5	0	5	4	3	4	2	2	4	3	5	4	4	2	4	5	5	5	0	0	4	4
271	2	5	4	NSW	3	2	4	4	4	4	4	2	3	4	4	4	2	3	4	NR	NR	NR	NR	NR	4	4	3	0	0	3	3	3	4	0	4	3	4	4	3	4	4	0	0	0	0	0	4	4
272	1	6	1	Swanbourne	4	3	4	4	3	4	3	2	4	3	4	4	3	4	4	3	3	4	3	4	3	4	3	4	3	3	3	3	3	3	3	2	3	3	3	3	3	3	3	3	3	3	3	3
273	1	6	1	Mt Claremont	5	4	3	3	5	5	2	3	3	5	5	5	3	3	5	5	5	3	1	3	5	5	5	5	5	5	3	5	3	5	5	3	5	5	4	5	5	3	3	5	5	3	5	5
274	2	6	1	Mt Claremont	4	2	5	2	4	4	4	4	4	5	5	3	3	2	4	4	4	1	2	1	4	4	0	0	0	0	0	0	0	0	0	0	0	0	0	0	0	0	0	0	0	0	0	0
275	2	6	1	Swanbourne	4	5	5	3	1	5	3	4	4	2	3	5	4	4	4	NR	NR	4	4	4	5	NR	4	2	4	4	0	1	4	4	3	4	3	5	4	2	3	0	0	4	4	4	1	0
276	2	3	1	Claremont	4	3	4	2	5	4	1	1	5	5	5	5	1	3	5	5	3	5	1	1	5	5	4	4	3	3	1	4	3	3	2	5	5	5	5	5	5	1	3	4	5	5	5	3
277	1	3	1	Claremont	5	5	5	3	5	5	2	1	5	5	5	5	5	3	5	5	3	3	2	3	5	5	4	4	5	3	2	5	5	0	4	5	5	5	4	4	5	2	5	5	0	4	4	5
278	1	5	2	Mosman Park	4	NR	NR	4	NR	5	NR	NR	NR	4	NR	NR	NR	4	3	NR	NR	NR	NR	4	4	4	5	0	0	4	0	5	0	0	0	2	0	0	0	4	4	0	0	0	0	4	4	4
279	1	4	1	Claremont	4	NR	NR	NR	1	3	1	NR	4	1	4	1	1	NR	NR	1	4	4	1	4	4	4	5	0	0	0	0	3	0	0	4	0	0	0	0	0	0	0	0	4	0	4	4	4
280	2	6	1	Swanbourne	4	3	NR	4	NR	4	4	3	3	4	4	4	3	4	4	NR	NR	4	4	4	4	3	4	0	0	4	0	4	4	3	3	3	4	4	3	4	4	0	0	4	4	4	4	3
281	1	5	2	Cottesloe	4	2	1	3	4	4	4	1	4	5	5	5	4	4	4	5	5	4	1	1	5	5	0	0	0	0	0	0	0	0	0	0	0	0	0	0	0	0	0	0	0	0	0	0
282	1	6	1	Swanbourne	4	4	4	NR	5	4	4	4	4	5	4	4	3	4	5	5	1	4	4	4	5	5	0	0	0	0	0	0	0	0	0	0	0	0	0	0	0	0	0	0	0	0	0	0
283	1	5	1	NR	4	3	4	2	5	5	3	4	3	4	4	2	3	4	5	4	3	2	1	3	4	4	3	4	3	4	2	4	3	4	3	2	0	4	3	3	4	3	4	4	0	4	4	4
284	1	5	1	Claremont	NR	NR	NR	NR	NR	NR	NR	NR	NR	NR	NR	NR	NR	NR	NR	NR	NR	NR	NR	NR	NR	NR	0	0	0	0	0	0	0	0	0	0	0	0	0	0	0	0	0	0	0	0	0	0
285	2	5	4	Wagga Wagga	4	2	2	3	2	4	3	2	4	4	4	3	2	3	4	2	2	2	2	3	4	4	4	3	5	3	5	4	5	3	4	4	4	3	3	3	4	3	3	4	3	4	5	4
286	2	5	1	Mt Claremont	4	4	4	4	4	4	4	1	1	5	NR	3	3	1	3	4	4	4	4	4	5	4	5	0	4	4	2	5	2	5	5	5	0	3	3	4	4	2	2	4	3	5	5	4
287	1	3	2	Nedlands	5	4	4	3	3	4	4	2	2	4	4	3	3	4	5	1	5	3	4	4	4	5	3	3	4	4	3	4	4	3	3	4	3	4	3	3	4	3	4	3	2	3	3	3
288	1	6	2	West Leederville	4	5	5	5	5	5	5	5	4	4	4	4	4	4	4	4	4	5	4	5	4	4	4	5	5	5	5	5	5	5	4	4	4	4	5	4	4	4	4	5	4	5	4	4
289	1	6	1	Claremont	4	NR	NR	4	NR	5	NR	5	4	5	5	5	4	NR	5	NR	NR	NR	NR	NR	5	5	4	0	0	3	0	5	0	5	4	4	5	5	4	5	5	0	0	0	0	0	5	4
290	1	6	2	City Beach	4	NR	NR	4	NR	NR	NR	NR	4	5	5	5	NR	NR	NR	NR	4	NR	NR	NR	5	5	4	0	0	0	0	0	0	0	4	5	5	5	0	0	4	0	4	0	0	0	5	0
291	1	3	2	City Beach	5	3	5	5	1	4	2	4	5	5	5	4	4	4	5	1	1	4	1	3	5	5	4	3	0	0	0	4	3	3	3	4	4	3	0	0	4	3	3	3	4	3	3	4
292	2	5	1	Swanbourne	4	4	5	5	5	5	5	3	3	5	5	3	3	4	4	5	5	4	3	4	5	5	4	4	4	4	3	4	4	3	3	3	4	3	3	4	4	2	4	4	3	4	4	4
293	1	6	1	Claremont	4	1	3	4	1	5	4	NR	4	NR	NR	5	5	5	NR	NR	NR	NR	NR	NR	NR	4	5	0	3	3	0	4	3	0	2	0	0	4	5	5	0	0	0	0	0	0	0	3
294	1	3	2	Cottesloe	4	3	4	4	NR	4	2	NR	4	4	5	4	3	3	4	1	1	1	1	3	4	4	3	4	4	2	0	4	4	0	3	3	4	4	4	4	4	0	0	0	0	4	4	4
295	1	6	2	Melville	5	5	5	4	4	5	4	2	5	5	5	4	4	4	5	4	4	4	4	5	5	5	3	5	5	4	5	5	5	5	4	4	5	4	4	4	4	4	4	4	4	4	4	4
296	2	2	2	Perth	5	4	5	3	4	4	3	NR	4	5	5	3	NR	4	5	4	4	NR	NR	3	5	5	4	4	2	3	3	4	3	0	3	3	3	3	0	2	4	3	3	0	0	3	4	4
297	1	4	1	Mt Claremont	3	3	1	1	5	3	2	2	3	3	3	4	3	3	4	5	4	3	3	3	3	3	3	3	4	3	1	3	3	4	4	2	3	4	3	3	3	1	1	3	3	3	3	3
298	1	6	1	Mt Claremont	4	1	1	3	1	4	3	1	3	4	4	1	2	3	4	1	1	3	3	1	5	4	4	4	4	3	0	4	4	0	3	3	4	3	3	4	4	0	0	4	2	0	3	5
299	1	5	1	Claremont	4	3	2	4	1	5	5	3	5	5	5	2	3	4	5	1	3	1	1	1	5	5	3	4	4	3	5	4	5	3	3	3	4	4	3	3	4	0	3	3	5	5	3	1
300	NR	NR	2	Mariginup	2	2	3	4	3	3	4	3	3	2	2	4	5	4	3	3	3	3	5	3	3	2	4	4	4	4	4	4	4	3	3	3	4	5	4	3	3	3	3	5	5	5	3	3
301	2	5	1	Mt Claremont	5	3	2	2	2	4	2	2	3	4	4	2	2	3	4	2	2	3	1	1	4	4	3	4	0	4	4	4	4	0	4	3	3	0	0	3	3	3	3	3	0	0	4	4
302	2	6	1	Claremont	4	NR	4	NR	5	NR	4	3	4	3	4	4	4	4	5	NR	5	5	4	4	4	5	NR	4	5	NR	5	NR	4	4	4	3	4	4	4	4	5	NR	5	5	4	4	5	5
303	1	4	1	Mt Claremont	4	2	4	4	4	4	NR	NR	4	4	4	4	4	3	4	4	4	4	2	3	4	4	4	5	3	2	3	5	NR	NR	3	3	4	4	4	3	4	3	4	4	NR	4	3	4
304	1	4	2	City Beach	4	5	5	3	5	5	3	2	4	5	5	5	4	3	5	5	4	5	5	5	5	5	4	4	4	3	4	4	4	NR	3	3	4	NR	NR	3	4	3	4	4	4	4	4	3
305	1	1	1	Swanbourne	3	1	4	3	4	5	4	4	4	2	3	3	3	4	3	4	4	2	2	2	5	5	4	4	4	4	4	3	3	3	3	2	2	3	5	3	4	4	4	5	3	3	4	5
306	1	3	2	Maylands	4	2	2	3	4	3	5	NR	3	4	4	4	3	3	4	NR	NR	4	4	4	4	3	4	3	NR	3	4	NR	3	NR	4	4	3	2	3	4	4	NR	NR	3	NR	3	5	5
307	3	2	2	Hamilton Hill	5	2	3	3	2	3	4	2	4	5	5	1	1	4	4	2	3	1	1	3	1	5	3	5	5	5	5	5	5	5	5	4	5	4	3	4	5	4	5	5	5	5	5	5
308	1	6	2	Nedlands	5	3	3	5	5	5	2	1	4	5	5	5	1	3	4	4	3	4	4	4	3	5	3	4	3	3	4	3	4	3	3	3	3	4	3	3	3	4	3	3	5	3	3	3
309	1	5	1	Mt Claremont	5	3	1	4	4	5	3	1	2	5	4	3	3	3	4	4	5	1	1	2	5	5	4	4	NR	4	4	5	4	NR	NR	3	4	4	4	4	3	4	3	NR	NR	3	3	3
310	2	4	1	Claremont	3	2	2	1	2	3	2	3	3	4	4	4	3	1	2	4	3	4	3	2	3	4	4	NR	NR	NR	2	4	2	3	3	5	4	3	3	1	4	1	4	4	4	4	4	3
311	1	4	1	Claremont	4	1	NR	5	5	5	NR	5	4	2	4	5	2	5	3	5	5	5	3	1	1	5	4	NR	NR	5	1	5	NR	2	4	4	3	5	4	5	4	1	5	5	4	NR	5	1
312	2	6	1	Claremont	5	3	5	1	5	4	3	5	5	5	5	5	5	5	5	5	5	4	4	4	4	4	5	1	5	3	5	5	5	3	3	3	5	3	4	3	3	1	5	5	1	4	4	4
313	2	3	1	Swanbourne	4	3	2	4	2	4	2	2	3	3	4	2	2	4	4	3	3	4	1	4	3	4	4	3	4	4	4	4	4	4	4	4	4	4	4	4	4	4	4	4	4	3	4	4
314	1	6	1	Claremont	5	5	5	5	5	5	5	1	5	5	5	5	5	5	5	5	5	5	5	5	5	5	5	5	5	5	5	5	5	4	5	5	5	5	5	5	5	5	5	NR	NR	5	5	5
315	1	4	2	Doubleview	4	3	3	4	4	4	3	4	4	3	3	2	3	4	4	4	2	2	2	3	5	4	3	3	3	4	3	4	4	5	5	3	4	3	5	4	4	4	2	3	3	4	5	3
316	2	4	2	Doubleview	4	4	4	3	5	5	4	4	5	4	4	3	4	3	4	5	5	4	4	3	4	4	4	4	4	4	4	4	4	4	4	3	3	3	4	4	4	3	3	3	3	3	3	4
317	2	5	1	Swanbourne	5	3	3	5	2	5	5	5	5	5	5	5	5	5	5	3	3	3	3	3	3	3	5	4	4	5	5	5	5	5	5	5	5	5	5	5	5	5	5	5	5	5	5	5
318	1	5	1	Swanbourne	5	3	3	5	2	5	5	5	5	5	5	5	5	5	5	3	3	3	3	3	3	3	5	4	4	5	5	5	5	5	5	5	5	5	5	5	5	5	5	5	5	5	5	5
319	2	4	1	Claremont	5	2	2	3	4	4	1	NR	4	4	4	4	4	2	4	4	4	4	1	3	4	4	3	NR	3	3	3	3	NR	NR	2	2	4	2	3	NR	3	3	NR	4	NR	NR	3	4
320	1	4	1	Mt Claremont	4	3	3	5	5	4	4	1	4	4	4	5	3	4	5	5	4	2	3	1	5	5	4	3	3	5	5	4	4	1	4	4	4	4	3	4	3	1	4	3	3	3	3	4
321	1	5	1	Mt Claremont	4	3	3	3	5	4	4	1	4	4	4	5	3	4	5	5	4	1	4	1	5	5	4	3	3	3	5	4	4	1	4	4	4	4	3	4	3	1	4	3	4	3	3	4
322	2	4	1	Claremont	5	3	4	2	5	4	2	1	5	5	4	5	5	2	5	5	5	4	5	4	4	5	4	4	3	NR	4	4	NR	NR	3	1	3	3	2	3	3	3	4	3	4	3	3	3
323	2	5	1	Mt Claremont	3	2	2	4	5	5	4	2	4	4	5	5	5	4	4	5	5	5	5	4	4	5	4	4	3	3	4	4	4	3	2	3	3	3	3	4	3	4	4	3	4	3	3	3
324	2	6	2	Cottesloe	2	2	1	3	4	4	5	2	4	5	5	5	4	5	5	3	5	2	5	3	5	5	4	3	3	4	4	4	5	3	5	5	5	5	5	3	4	3	4	4	5	4	5	5
325	1	2	2	Subiaco	4	4	4	4	4	4	4	3	3	3	2	2	2	2	5	5	5	4	2	4	4	4	4	4	4	4	4	4	4	NR	3	3	2	2	2	2	5	5	5	4	2	4	4	4
326	2	5	1	Swanbourne	5	3	3	NR	2	5	5	4	3	5	5	5	5	4	5	2	4	4	5	4	5	5	4	3	3	NR	2	5	5	4	3	5	5	5	5	3	4	1	4	5	5	5	5	5
327	1	4	1	Mt Claremont	5	5	5	4	4	5	2	1	3	5	4	NR	4	4	5	3	NR	4	3	4	5	4	4	5	3	3	3	4	2	5	3	3	3	NR	4	4	4	4	3	4	3	4	4	4
328	2	5	1	Mt Claremont	4	1	4	3	2	4	2	3	4	4	4	5	4	4	4	2	2	4	4	4	4	4	4	1	4	3	2	4	2	3	4	4	4	5	4	4	4	2	2	4	4	4	4	4
329	2	4	1	Mt Claremont	4	4	5	4	5	5	4	2	4	4	5	NR	3	4	5	4	5	3	4	4	5	5	4	4	4	4	4	4	4	3	4	4	4	NR	4	4	5	3	4	NR	4	4	4	5
330	1	5	1	Mt Claremont	3	1	1	1	4	4	1	1	3	1	3	3	1	1	3	1	3	NR	1	1	3	3	4	NR	NR	NR	4	4	NR	NR	NR	NR	NR	NR	4	4	4	NR	4	4	4	4	4	3
331	2	4	1	Claremont	NR	NR	NR	NR	NR	NR	NR	NR	NR	NR	NR	NR	NR	NR	NR	NR	NR	NR	NR	NR	NR	NR	NR	NR	NR	NR	NR	NR	NR	NR	NR	NR	NR	NR	NR	NR	NR	NR	NR	NR	NR	NR	NR	NR
332	1	5	2	City Beach	5	4	2	3	4	5	4	2	2	5	5	4	3	5	5	3	5	5	2	2	4	5	5	5	5	5	5	5	5	5	5	5	3	3	5	NR	3	5	5	5	5	5	5	5
333	1	5	1	Claremont	4	3	3	1	1	5	3	1	4	4	4	4	2	3	5	4	4	3	1	1	5	4	4	3	4	3	1	4	4	3	4	4	4	4	3	3	4	4	4	3	3	3	3	3
334	2	3	1	Claremont	NR	NR	NR	NR	NR	NR	NR	NR	NR	NR	NR	NR	NR	NR	NR	NR	NR	NR	NR	NR	NR	NR	4	4	3	3	3	4	4	4	2	4	4	3	4	3	4	4	4	2	4	2	4	4
335	1	5	1	Swanbourne	5	5	5	5	5	5	5	5	5	5	5	5	4	5	5	4	5	5	2	4	5	5	5	3	5	2	5	5	5	5	3	4	4	4	4	2	5	4	4	4	4	4	3	5
336	2	3	1	Mt Claremont	3	1	2	4	4	5	3	2	4	3	4	2	2	3	4	4	4	3	2	NR	5	4	4	3	3	3	NR	4	NR	NR	3	3	3	NR	NR	2	3	NR	NR	NR	NR	3	3	4
337	1	6	1	Mt Claremont	5	5	1	NR	1	5	5	5	3	5	5	1	3	3	5	1	1	1	1	1	5	5	4	3	2	NR	2	3	2	2	3	2	2	3	3	3	3	2	2	2	2	2	4	3
338	2	4	1	Claremont	5	5	5	1	5	4	3	1	5	5	5	4	2	4	5	5	3	5	4	5	5	5	5	4	3	3	4	3	3	4	3	3	2	3	3	4	4	4	4	2	4	2	4	3
339	1	5	1	Swanbourne	3	4	1	3	4	5	4	2	3	4	4	5	3	4	4	3	4	1	5	4	5	4	3	4	3	3	4	5	4	3	3	4	4	1	3	4	3	3	4	3	2	4	5	4
340	1	2	1	Mt Claremont	4	3	4	2	3	3	2	2	3	4	4	2	3	2	5	4	5	3	3	2	5	4	4	3	4	NR	4	4	4	4	4	2	3	4	4	4	4	4	4	4	4	4	NR	NR
341	1	4	1	NR	4	4	3	NR	4	NR	3	3	2	4	5	3	1	3	5	2	4	3	2	3	4	5	4	4	3	NR	5	NR	3	3	2	4	5	3	1	3	5	2	4	3	2	3	4	5
342	1	3	1	Swanbourne	5	3	NR	4	NR	4	1	3	4	5	5	3	4	4	5	5	5	NR	NR	4	5	5	4	4	NR	5	NR	5	5	5	5	4	4	NR	5	5	4	4	4	NR	NR	4	5	5
343	2	3	1	Swanbourne	3	2	2	4	4	4	2	1	4	4	4	2	4	3	4	4	4	3	2	4	5	4	3	3	2	3	2	3	3	5	2	2	2	3	3	2	3	3	3	3	4	2	5	4
344	1	5	1	Mt Claremont	4	4	3	2	4	3	3	2	3	4	5	4	3	4	4	2	4	3	4	4	4	4	4	4	3	4	4	3	4	2	3	4	5	4	4	4	4	2	4	3	4	4	2	4
345	1	4	1	Claremont	4	NR	NR	NR	NR	NR	NR	NR	NR	NR	NR	NR	NR	NR	NR	NR	NR	NR	NR	NR	NR	NR	4	5	4	2	1	4	1	NR	5	4	5	4	3	NR	5	1	3	5	2	5	4	4
346	1	4	1	Mt Claremont	5	NR	4	4	5	5	2	1	5	5	5	3	1	4	5	5	5	5	1	4	4	5	4	NR	NR	4	3	4	1	NR	2	4	3	NR	NR	NR	4	2	5	4	1	4	NR	3
347	2	4	1	Claremont	4	3	3	2	5	3	2	1	3	4	3	3	3	3	4	5	5	4	4	4	4	4	4	3	3	3	2	3	2	1	3	3	3	3	3	3	4	1	3	4	4	4	4	4
348	1	5	1	Claremont	5	5	5	3	5	5	1	1	5	5	5	4	3	5	5	5	5	5	5	4	5	5	4	4	3	3	3	5	3	3	4	5	4	4	3	5	5	3	5	4	4	4	5	4
349	1	5	1	Swanbourne	3	4	4	4	4	4	4	1	3	5	5	4	4	5	5	5	5	1	1	4	4	5	3	4	4	4	4	4	4	1	3	5	5	4	4	5	5	5	5	1	1	4	4	5
350	1	4	1	Swanbourne	4	2	4	4	5	4	3	2	5	4	NR	5	3	2	4	5	5	5	2	3	5	5	3	3	4	3	2	5	4	NR	1	4	NR	5	3	3	4	2	5	5	5	3	3	4
351	1	4	1	Claremont	4	4	5	5	5	5	3	3	5	4	4	3	2	3	3	4	5	3	3	3	5	5	3	3	3	3	3	3	4	3	3	3	3	3	3	3	3	2	4	3	3	3	3	3
352	1	1	2	Subiaco	5	4	5	5	5	5	2	NR	4	5	5	1	5	5	5	5	5	2	2	4	5	5	5	5	5	5	5	5	NR	NR	NR	5	NR	NR	5	NR	5	5	5	NR	NR	5	5	5
353	1	6	1	Claremont	4	4	NR	NR	NR	5	NR	NR	4	5	5	4	4	NR	5	NR	NR	4	4	4	4	4	NR	NR	NR	NR	NR	NR	NR	NR	NR	NR	NR	NR	NR	NR	NR	NR	NR	NR	NR	NR	NR	NR
354	1	3	1	Claremont	5	3	3	2	1	5	3	4	5	5	5	5	4	5	5	1	3	3	1	3	5	5	5	5	4	4	4	5	4	5	3	4	4	4	4	4	4	2	3	3	3	3	4	3
355	2	2	2	Joondanna	3	5	5	5	5	5	5	4	5	4	4	5	5	4	5	5	5	5	4	4	4	5	4	5	5	5	5	5	5	5	5	4	4	5	5	4	5	5	5	5	4	4	5	5
356	2	6	1	Claremont	4	4	5	4	4	4	NR	3	4	4	4	4	4	4	4	3	4	4	5	4	4	4	NR	4	3	4	4	3	NR	NR	3	4	4	4	4	4	4	3	4	4	3	3	4	4
357	1	5	1	Claremont	5	4	4	4	5	4	4	1	3	4	4	4	3	4	5	5	5	3	4	4	4	4	3	4	4	NR	4	NR	3	4	3	4	5	5	3	3	5	4	5	3	5	4	4	3
358	1	5	1	Claremont	4	3	4	4	4	3	4	4	4	4	4	4	3	4	4	4	4	4	4	4	4	4	4	4	4	3	4	4	4	4	4	4	4	4	3	3	4	4	4	4	4	4	4	4
359	1	2	1	Claremont	4	NR	NR	4	5	4	4	NR	5	4	4	4	NR	4	4	4	4	NR	NR	NR	5	4	4	NR	NR	4	4	4	5	NR	1	3	4	2	NR	4	4	2	4	NR	NR	NR	3	4
360	1	6	1	Claremont	3	5	5	4	5	4	4	2	4	4	4	5	2	2	4	4	4	5	5	5	3	4	NR	NR	NR	NR	NR	NR	NR	NR	NR	NR	NR	NR	NR	NR	NR	NR	NR	NR	NR	NR	NR	NR
361	1	2	1	Claremont	3	2	3	3	4	5	NR	2	3	3	2	3	2	2	2	4	4	3	1	1	5	3	3	NR	NR	NR	4	4	4	NR	3	3	4	4	3	NR	3	4	4	4	NR	2	4	4
362	1	2	1	Claremont	3	2	4	2	5	3	4	2	3	3	3	3	3	3	3	5	4	3	2	4	5	4	4	3	4	3	3	3	3	3	3	3	3	3	3	2	5	2	3	4	NR	5	5	5
363	1	3	1	Claremont	5	3	5	2	4	3	2	1	5	5	5	4	3	4	5	1	4	2	4	3	5	4	5	3	5	4	4	5	4	4	3	4	4	4	5	5	4	5	5	5	5	3	3	5
364	2	4	2	Cottesloe	3	2	4	1	5	4	5	2	4	5	4	3	4	3	5	5	4	2	2	3	5	5	4	4	5	NR	3	4	3	4	5	4	5	4	5	4	4	3	3	3	NR	4	4	5
365	1	4	2	Cottesloe	3	3	5	4	5	5	4	5	5	3	4	4	4	4	4	5	5	5	3	4	5	5	3	3	5	4	3	5	5	5	5	3	4	4	4	4	4	1	5	5	3	4	5	5
366	2	3	1	Swanbourne	4	1	2	3	4	2	2	1	4	3	4	4	3	1	3	4	4	3	3	2	4	4	4	NR	4	2	2	5	4	NR	3	3	3	3	3	NR	3	1	2	3	4	NR	5	3
367	1	6	1	Mt Claremont	5	3	2	1	5	2	NR	1	2	4	4	3	2	2	4	4	2	3	4	4	1	4	3	4	3	4	2	4	NR	3	4	3	4	3	3	4	4	2	4	3	3	4	4	3
368	2	4	1	Claremont	4	2	3	3	3	4	NR	3	3	4	3	4	4	4	4	4	4	5	1	4	4	4	4	NR	4	4	4	4	NR	3	3	2	3	4	4	4	4	4	4	2	NR	4	4	4
369	1	4	1	Claremont	5	2	4	4	5	5	3	5	4	2	4	2	3	3	3	5	4	5	3	3	3	5	NR	NR	NR	NR	NR	NR	NR	NR	NR	NR	NR	NR	NR	NR	NR	NR	NR	NR	NR	NR	NR	NR
370	2	3	1	Mt Claremont	4	3	4	3	4	5	3	2	4	4	4	4	4	3	4	4	4	4	5	4	3	4	4	3	3	4	1	4	4	4	3	4	4	3	3	3	3	1	3	4	4	4	3	4
371	1	4	1	Claremont	5	4	3	3	5	5	2	2	4	5	4	3	3	4	4	5	3	5	2	3	5	5	3	4	3	3	2	3	2	3	3	2	4	4	4	4	4	1	3	3	4	3	5	5
372	1	2	1	Swanbourne	5	2	4	4	4	4	4	3	3	5	5	2	2	4	5	4	4	2	2	4	4	5	3	NR	3	3	3	4	4	3	3	3	3	NR	NR	3	4	3	4	NR	NR	4	2	3
373	1	5	1	Mt Claremont	5	2	4	2	1	4	2	1	4	5	5	4	4	4	5	1	3	3	3	4	4	4	3	4	1	3	4	4	3	3	2	3	3	3	3	3	3	3	3	3	4	4	3	3
374	2	5	1	Mt Claremont	5	1	1	1	1	5	1	1	5	5	5	1	1	1	4	1	1	1	1	1	5	5	3	3	3	3	4	4	1	3	2	1	3	3	3	3	3	1	1	1	1	1	3	3
375	1	5	1	Mt Claremont	5	NR	NR	4	NR	4	3	NR	2	3	NR	3	3	3	3	1	4	2	NR	NR	4	4	4	NR	NR	2	NR	4	3	NR	2	3	NR	2	3	2	2	2	2	NR	NR	NR	3	3
376	1	3	5	USA	4	3	3	4	3	5	3	3	5	4	4	4	5	5	4	3	3	4	3	3	5	4	5	5	5	4	5	5	5	5	5	3	4	4	5	4	5	5	5	5	5	5	5	5
377	1	5	1	Mt Claremont	5	5	4	4	5	5	5	1	2	NR	5	4	2	3	4	5	5	5	5	5	5	5	5	5	5	4	5	5	5	5	5	NR	5	3	4	2	2	5	5	5	2	5	5	5
378	1	5	3	Geraldton	5	3	2	1	5	2	NR	1	2	4	4	3	2	2	4	4	2	3	4	4	1	4	3	4	3	4	2	4	NR	3	4	3	4	3	3	4	4	2	4	3	3	4	4	3
379	4	5	3	Geraldton	5	3	2	1	5	2	NR	1	2	4	4	3	2	2	4	4	2	3	4	4	1	4	3	4	3	4	2	4	NR	3	4	3	4	3	3	4	4	2	4	3	3	4	4	3
380	2	4	1	Claremont	5	2	4	4	5	5	3	5	4	2	4	2	3	3	3	5	4	5	3	3	3	5	NR	NR	NR	NR	NR	NR	NR	NR	NR	NR	NR	NR	NR	NR	NR	NR	NR	NR	NR	NR	NR	NR
381	2	2	2	Subiaco	4	4	4	4	4	4	4	3	3	3	2	2	2	2	5	5	5	4	2	4	4	4	4	4	4	4	4	4	4	NR	3	3	2	2	2	2	5	5	5	4	2	4	4	4
382	1	3	1	Mt Claremont	3	1	2	4	4	5	3	2	4	3	4	2	2	3	4	4	4	3	2	NR	5	4	4	3	3	3	NR	4	NR	NR	3	3	3	NR	NR	2	3	NR	NR	NR	NR	3	3	4
383	2	6	1	Mt Claremont	5	5	1	NR	1	5	5	5	3	5	5	1	3	3	5	1	1	1	1	1	5	5	4	3	2	NR	2	3	2	2	3	2	2	3	3	3	3	2	2	2	2	2	4	3
384	2	5	1	Swanbourne	3	4	4	4	4	4	4	1	3	5	5	4	4	5	5	5	5	1	1	4	4	5	3	4	4	4	4	4	4	1	3	5	5	4	4	5	5	5	5	1	1	4	4	5
385	2	4	1	Swanbourne	4	2	4	4	5	4	3	2	5	4	NR	5	3	2	4	5	5	5	2	3	5	5	3	3	4	3	2	5	4	NR	1	4	NR	5	3	3	4	2	5	5	5	3	3	4
386	2	4	1	Claremont	4	4	5	5	5	5	3	3	5	4	4	3	2	3	3	4	5	3	3	3	5	5	3	3	3	3	3	3	4	3	3	3	3	3	3	3	3	2	4	3	3	3	3	3
387	1	6	1	Claremont	4	NR	4	NR	5	NR	4	3	4	3	4	4	4	4	5	NR	5	5	4	4	4	5	NR	4	5	NR	5	NR	4	4	4	3	4	4	4	4	5	NR	5	5	4	4	5	5
388	2	4	2	City Beach	4	5	5	3	5	5	3	2	4	5	5	5	4	3	5	5	4	5	5	5	5	5	4	4	4	3	4	4	4	NR	3	3	4	NR	NR	3	4	3	4	4	4	4	4	3
389	1	5	1	Swanbourne	4	5	5	3	1	5	3	4	4	2	3	5	4	4	4	NR	NR	4	4	4	5	NR	4	2	4	4	0	1	4	4	3	4	3	5	4	2	3	0	0	4	4	4	1	0
390	1	4	1	Claremont	4	1	2	3	5	NR	2	2	4	5	5	3	4	3	4	5	5	3	3	3	4	4	4	4	4	3	2	0	4	3	3	3	4	3	4	4	4	1	3	4	3	3	4	4
391	1	5	1	Swanbourne	5	3	3	3	5	4	4	1	5	3	5	4	3	4	4	5	2	4	4	3	5	5	3	4	4	4	2	3	2	3	1	3	3	4	4	4	4	2	4	4	4	2	4	4
392	1	5	1	Swanbourne	5	3	3	3	5	4	4	1	5	3	5	4	3	4	4	5	2	4	4	3	5	5	3	4	4	4	2	3	2	3	1	3	3	4	4	4	4	2	4	4	4	2	4	4
393	2	5	2	Floreat	4	NR	NR	4	5	4	NR	NR	4	5	5	4	NR	NR	NR	5	5	4	5	5	5	5	4	0	0	0	4	4	0	0	4	3	4	4	0	0	0	4	4	4	4	3	4	4
